# Supplementary material
Source: publisher figshare collection journal article supplement (https://sage.figshare.com/ndownloader/files/15674546)
Supplement: Supplementary file 1 [file 15674546]

**Supplementary Table 1.** Comparison of relevant clinical characteristics of the two study subgroups that received a diagnosis after 1998.

|                                                                      | <b>Overall patients</b> | <b>EO (<math>\leq 17</math> yrs)</b> | <b>LO (<math>\geq 60</math> yrs)</b> | <b><i>p</i>-value</b> |
|----------------------------------------------------------------------|-------------------------|--------------------------------------|--------------------------------------|-----------------------|
|                                                                      | 103                     | 52                                   | 51                                   |                       |
| <b>Sex (F/M)</b>                                                     | 54/49<br>(52/48%)       | 28/24<br>(54/46%)                    | 26/25<br>(51/49%)                    | $p = 0.7$             |
| <b>Family history</b>                                                | 16 (15%)                | 14 (27%)                             | 2 (4%)                               | $p < 0.005$           |
| <b>Current smokers</b>                                               | 24 (23%)                | 15 (29%)                             | 9 (18%)                              | $p = 0.2$             |
| <b>Localisation at diagnosis</b>                                     |                         |                                      |                                      |                       |
| L1                                                                   | 45 (44%)                | 20 (38%)                             | 25 (49%)                             | $p < 0.01$            |
| L2                                                                   | 19 (18%)                | 4 (8%)                               | 15 (29%)                             |                       |
| L3                                                                   | 39 (38%)                | 28 (54%)                             | 11 (22%)                             |                       |
| L4                                                                   | 14 (13%)                | 12 (23%)                             | 2 (4%)                               | $p < 0.01$            |
| <b>Behaviour at diagnosis</b>                                        |                         |                                      |                                      |                       |
| B1                                                                   | 67 (65%)                | 38 (73%)                             | 29 (57%)                             | $p < 0.05$            |
| B2                                                                   | 30 (29%)                | 9 (17%)                              | 21 (41%)                             |                       |
| B3                                                                   | 6 (6%)                  | 5 (10%)                              | 1 (2%)                               |                       |
| <b>Progression to complicated behaviour (B2+B3) during follow-up</b> | 14/103<br>14%           | 12/38<br>31%                         | 2/29<br>7%                           | $p < 0.001$           |
| <b>Perianal disease</b>                                              | 30 (29%)                | 18 (35%)                             | 12 (23%)                             | $p = 0.3$             |
| <b>Extraintestinal manifestation</b>                                 | 22 (21%)                | 14 (27%)                             | 8 (16%)                              | $p = 0.2$             |

**Supplementary Table 2.** Use of medical or surgical therapy during the first two years since Crohn's disease diagnosis (subgroups that received a diagnosis after 1998).

|                                            | <b>Overall patients</b> | <b>EO (<math>\leq 17</math> yrs)</b> | <b>LO (<math>\geq 60</math> yrs)</b> | <b><i>p</i>-value</b> |
|--------------------------------------------|-------------------------|--------------------------------------|--------------------------------------|-----------------------|
|                                            | 103                     | 52                                   | 51                                   |                       |
| <b>Corticosteroids</b>                     | 62 (37%)                | 39 (75%)                             | 23 (45%)                             | <i>p</i> < 0.005      |
| <b>Immunosuppressants</b>                  | 35 (34%)                | 23 (44%)                             | 12 (23%)                             | <i>p</i> < 0.05       |
| <b>Anti-TNF-<math>\alpha</math> agents</b> | 17 (16%)                | 14 (27%)                             | 3 (6%)                               | <i>p</i> < 0.01       |
| <b>First surgery</b>                       | 27 (26%)                | 10 (19.2%)                           | 17 (33%)                             | <i>p</i> = 0.2        |
| <b>Second surgery</b>                      | 1 (1%)                  | 1 (2%)                               | 0 (0%)                               | <i>p</i> = 0.3        |
